# Supplementary figures and images for: Genome-wide association studies on the Autosomes and Chromosome X uncover genetic basis of reproductive traits in Yorkshire pigs
Source: Research Square preprint supplement (doi:10.21203/rs.3.rs-8093455/v1), 2025-12-03

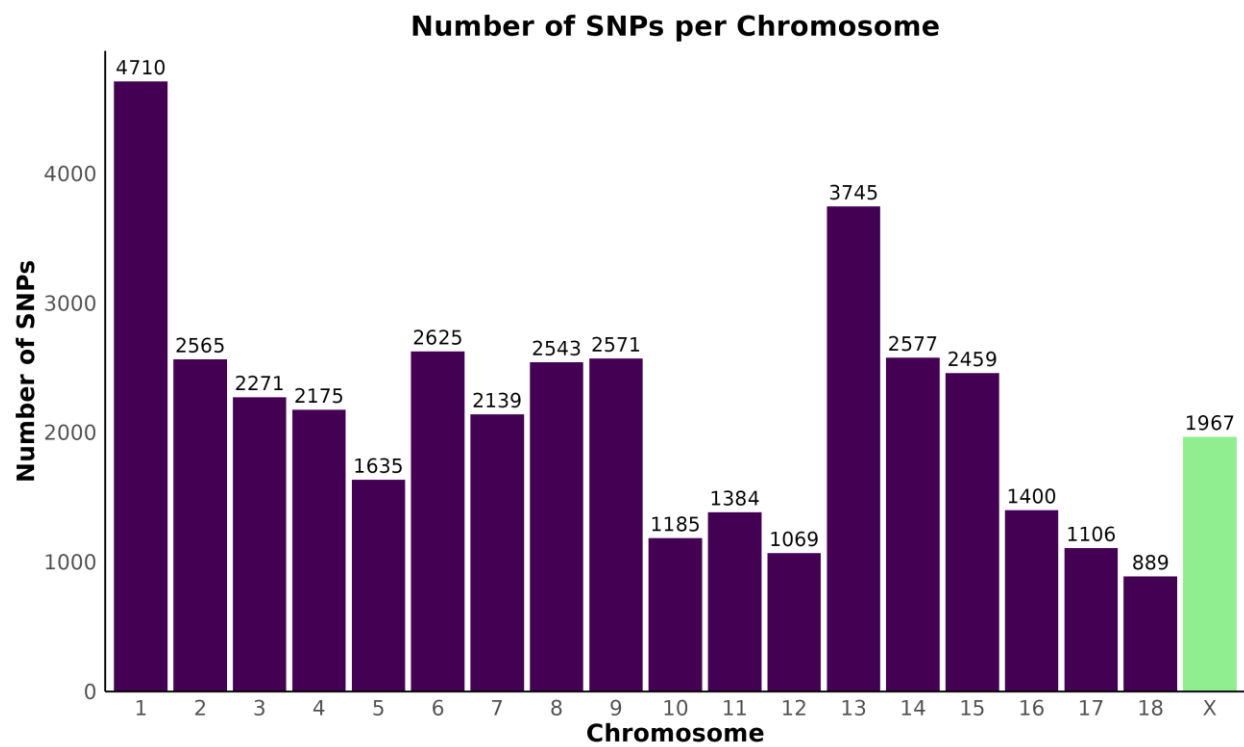

Figure. S1: Distribution of markers on both autosomes and X-chromosomes.

Supplement: Supplementary file 1 [file 36485e6de552f71db6c7272c.pdf]
